# Supplementary material for: Understanding the role of Cl doping in the oxygen evolution reaction on cuprous oxide by DFT
Source: Royal Society of Chemistry journal article supplement (doi:10.1039/d2cp02671f), 2022-01-01
Supplement: d2cp02671f1.pdf [file d2cp02671f1.pdf]

## Support Information

### Understanding The Role of Cl Doping in Oxygen Evolution Reaction on Cuprous Oxide by DFT

*Hai-Hang Chen<sup>a</sup>, Yongfei Ji<sup>\*b</sup>, and Ting Fan<sup>\*a</sup>*

<sup>a</sup> School of Chemistry and Chemical Engineering, South China University of Technology,

Guangzhou 510641, P. R. China

<sup>b</sup> School of Chemistry and Chemical Engineering, Guangzhou University,

Guangzhou 510006, P. R. China

E-mail address: [tingfan@scut.edu.cn](mailto:tingfan@scut.edu.cn); [yongfeiji2018@gzhu.edu.cn](mailto:yongfeiji2018@gzhu.edu.cn)

#### Gibbs Free Energy Calculation

The Gibbs reaction free energy change ( $\Delta G$ ) of each elementary step was based on the computational hydrogen electrode (CHE) model developed by Nørskov et al.<sup>1</sup> in which the energy of  $H^+ + e^-$  pair is related to the energy of the  $H_2$  gas and the potential. The thermodynamic correction was considered by the frequency calculation. Table S1 lists the zero-point energy corrections and entropic contributions of gaseous and intermediates adsorption on the goal substrates computed from their vibration frequencies in harmonic approximation. The gas-phase molecules are treated as an ideal gas.

Based on the four-electron reaction mechanism of OER, the change of Gibbs free energy for each elementary step of OER ( $\Delta G_1$ ,  $\Delta G_2$ ,  $\Delta G_3$ , and  $\Delta G_4$ ) can be calculated by the following formulas:

$$\Delta G_1 = G(*OH) \quad (S1)$$

$$\Delta G_2 = G(*O) - G(*OH) \quad (S2)$$

$$\Delta G_3 = G(*OOH) - G(*O) \quad (S3)$$

$$\Delta G_4 = 4.92 \text{ eV} - G(*OOH) \quad (S4)$$

The step with the highest  $\Delta G$  is the rate-determining step (RDS) of the OER is:

$$G^{OER} = \max[\Delta G_1, \Delta G_2, \Delta G_3, \Delta G_4] \quad (S5)$$

The overpotential of OER can be evaluated from the following formula:

$$\eta = (G^{OER} / e) - 1.23 \text{ V} \quad (S6)$$

**Table S1** Zero-point energy corrections and entropic contributions of gaseous and intermediates adsorption on substrates.

|                     | ZPE(eV) | TS(eV) |
|---------------------|---------|--------|
| H <sub>2</sub> O(l) | 0.56    | 0.67   |
| H <sub>2</sub> (g)  | 0.27    | 0.41   |
| *OH                 | 0.35    | 0      |
| *O                  | 0.05    | 0      |
| *OOH                | 0.41    | 0      |

**Table S2** Convergence test of the K-POINTS for  $2 \times 2$  supercell  $\text{Cu}_2\text{O}$  (111).

| K-POINTS | Total energy (eV) | $\Delta E/\text{atom}$ (eV) |
|----------|-------------------|-----------------------------|
| (1,1,1)  | -443.35487        |                             |
| (2,2,1)  | -443.56154        | 0.00172                     |
| (3,3,1)  | -443.56167        | 0.00000                     |
| (4,4,1)  | -443.56135        | 0.00000                     |

**Table S3** Convergence test of the vacuum layer for  $2 \times 2$  supercell  $\text{Cu}_2\text{O}$  (111).

| Vacuum layer (nm) | Total energy (eV) | $\Delta E/\text{atom}$ (eV) |
|-------------------|-------------------|-----------------------------|
| 0.12              | -443.58416        |                             |
| 0.13              | -443.56154        | 0.00019                     |
| 0.14              | -443.56907        | 0.00006                     |
| 0.15              | -443.56778        | 0.00001                     |

**Table S4** Convergence test of the plane-wave cutoff energy of  $\text{Cu}_2\text{O}$  (111) unit cell.

| Plane-wave cutoff energy (eV) | Total energy (eV) | $\Delta E/\text{atom}$ (eV) |
|-------------------------------|-------------------|-----------------------------|
| 510                           | -110.87961        |                             |
| 520                           | -110.88643        | 0.00006                     |
| 530                           | -110.88575        | 0.00001                     |

**Table S5** Gibbs reaction free energy changes ( $\Delta G$ ) of each intermediates and elementary step and overpotential ( $\eta$ ) on the active sites of different  $\text{Cu}_2\text{O}(111)$  surfaces. The numbers in red means that the potential-determining step  $\Delta G$ . The numbers in brackets mean the coordination number of intermediates.

| Active sites                        | $\Delta G^*_{\text{OH}}$ (eV) | $\Delta G^*_{\text{O}}$ (eV) | $\Delta G^*_{\text{OOH}}$ (eV) | $\Delta G_1$ (eV) | $\Delta G_2$ (eV) | $\Delta G_3$ (eV) | $\Delta G_4$ (eV) | $\eta$ (V) |
|-------------------------------------|-------------------------------|------------------------------|--------------------------------|-------------------|-------------------|-------------------|-------------------|------------|
| 1-<br>$\text{Cu}_2\text{O}(111)$    | 0.56 (2)                      | 1.74 (3)                     | 3.91 (2)                       | 0.56              | 1.18              | 2.16              | 1.01              | 0.93       |
| 2-<br>$\text{Cu}_2\text{O}(111)$    | 0.63 (2)                      | 2.00 (3)                     | 4.18 (2)                       | 0.63              | 1.37              | 2.18              | 0.74              | 0.95       |
| 3-<br>$\text{Cu}_2\text{O}(111)$    | 0.86 (2)                      | 1.92 (3)                     | 4.05 (2)                       | 0.86              | 1.05              | 2.13              | 0.87              | 0.90       |
| 1-Cl-<br>$\text{Cu}_2\text{O}(111)$ | -0.34 (2)                     | 1.16 (3)                     | 3.27 (2)                       | -0.34             | 1.50              | 2.11              | 1.65              | 0.88       |
| 2-Cl-<br>$\text{Cu}_2\text{O}(111)$ | -0.12 (2)                     | 1.26 (3)                     | 3.31 (2)                       | -0.12             | 1.39              | 2.05              | 1.61              | 0.82       |
| 3-Cl-<br>$\text{Cu}_2\text{O}(111)$ | -0.37 (2)                     | 1.20 (3)                     | 3.11 (2)                       | -0.37             | 1.57              | 1.91              | 1.81              | 0.68       |
| 4-Cl-<br>$\text{Cu}_2\text{O}(111)$ | -0.23 (2)                     | 1.17 (3)                     | 3.28 (2)                       | -0.23             | 1.39              | 2.12              | 1.64              | 0.89       |
| 5-Cl-<br>$\text{Cu}_2\text{O}(111)$ | -0.12 (2)                     | 1.26 (3)                     | 3.32 (2)                       | -0.12             | 1.38              | 2.06              | 1.60              | 0.83       |
| 6-Cl-<br>$\text{Cu}_2\text{O}(111)$ | -0.32 (2)                     | 1.16 (3)                     | 3.21 (2)                       | -0.32             | 1.48              | 2.05              | 1.71              | 0.82       |
| 7-Cl-<br>$\text{Cu}_2\text{O}(111)$ | -0.12 (2)                     | 1.68 (3)                     | 3.32 (2)                       | -0.12             | 1.81              | 1.63              | 1.60              | 0.58       |

|                                                   |           |          |          |       |      |      |       |      |
|---------------------------------------------------|-----------|----------|----------|-------|------|------|-------|------|
| 8-Cl-<br>Cu <sub>2</sub> O(111)                   | -0.32 (2) | 1.15 (3) | 3.21 (2) | -0.32 | 1.48 | 2.06 | 1.71  | 0.83 |
| 9-Cl-<br>Cu <sub>2</sub> O(111)                   | 0.19 (2)  | 1.73 (3) | 3.58 (2) | 0.19  | 1.54 | 1.84 | 1.34  | 0.61 |
| 10-Cl-<br>Cu <sub>2</sub> O(111)                  | 0.08 (2)  | 1.54 (3) | 3.54 (2) | 0.08  | 1.46 | 1.99 | 1.38  | 0.76 |
| 11-Cl-<br>Cu <sub>2</sub> O(111)                  | 0.04 (2)  | 1.26 (3) | 3.53 (2) | 0.04  | 1.22 | 2.27 | 1.39  | 1.04 |
| 1-V <sub>Cu</sub> -<br>Cu <sub>2</sub> O(111)     | 1.77 (2)  | 2.83 (3) | 5.07 (2) | 1.77  | 1.06 | 2.24 | -0.15 | 1.01 |
| 1'-V <sub>Cu</sub> -<br>Cu <sub>2</sub> O(111)    | 1.79 (3)  | 2.83 (3) | 5.31 (3) | 1.79  | 1.03 | 2.48 | -0.39 | 1.25 |
| 2-V <sub>Cu</sub> -<br>Cu <sub>2</sub> O(111)     | 1.50 (2)  | 3.25 (2) | 4.80 (2) | 1.50  | 1.75 | 1.55 | 0.12  | 0.52 |
| 1-V <sub>Cu</sub> -Cl-<br>Cu <sub>2</sub> O(111)  | 1.25 (2)  | 2.85 (2) | 4.70 (2) | 1.25  | 1.60 | 1.84 | 0.22  | 0.61 |
| 1'-V <sub>Cu</sub> -Cl-<br>Cu <sub>2</sub> O(111) | 1.58 (3)  | 2.78 (3) | 4.74 (3) | 1.58  | 1.20 | 1.95 | 0.18  | 0.72 |
| 2-V <sub>Cu</sub> -Cl-<br>Cu <sub>2</sub> O(111)  | 1.57 (2)  | 3.26 (2) | 4.82 (2) | 1.57  | 1.69 | 1.55 | 0.10  | 0.46 |
| 3-V <sub>Cu</sub> -Cl-<br>Cu <sub>2</sub> O(111)  | 1.48 (2)  | 3.21 (2) | 4.71 (2) | 1.48  | 1.73 | 1.50 | 0.21  | 0.50 |
| 4-V <sub>Cu</sub> -Cl-<br>Cu <sub>2</sub> O(111)  | 1.74 (2)  | 2.81 (3) | 5.02 (2) | 1.74  | 1.07 | 2.21 | -0.10 | 0.98 |
| 5-V <sub>Cu</sub> -Cl-<br>Cu <sub>2</sub> O(111)  | 1.48 (2)  | 3.21 (2) | 4.80 (2) | 1.48  | 1.72 | 1.59 | 0.12  | 0.49 |

---

**Table S6** Interaction/distortion analysis after OH/OOH adsorption on sites 1 and 2 of  $V_{Cu}$ - $Cu_2O(111)$  and  $V_{Cu-Cl-Cu_2O(111)}$  (eV). The numbers in brackets mean the coordination number of intermediates.

| Surface                    | Intermediates | $E_{dist}(Surf)$ | $E_{dist}(OH/O/OOH)$ | $E_{int}$ | $E_{ads}$ |
|----------------------------|---------------|------------------|----------------------|-----------|-----------|
| 1- $V_{Cu}$ - $Cu_2O(111)$ | *OH(2)        | 0.31             | 0.00                 | -2.22     | -1.91     |
| 1- $V_{Cu}$ - $Cu_2O(111)$ | *O(3)         | 0.59             | 0.00                 | -3.70     | -3.10     |
| 1- $V_{Cu}$ - $Cu_2O(111)$ | *OOH(2)       | 0.22             | 0.18                 | -0.80     | -0.40     |
| 1- $V_{Cu-Cl-Cu_2O(111)}$  | *OH(2)        | 1.42             | 0.00                 | -3.86     | -2.44     |
| 1'- $V_{Cu-Cl-Cu_2O(111)}$ | *O(3)         | 0.64             | 0.00                 | -3.79     | -3.15     |
| 1- $V_{Cu-Cl-Cu_2O(111)}$  | *OOH(2)       | 1.36             | 0.30                 | -2.39     | -0.73     |
| 2- $V_{Cu}$ - $Cu_2O(111)$ | *OH(2)        | 0.28             | 0.00                 | -2.46     | -2.18     |
| 2- $V_{Cu}$ - $Cu_2O(111)$ | *O(2)         | 0.54             | 0.00                 | -3.22     | -2.68     |
| 2- $V_{Cu}$ - $Cu_2O(111)$ | *OOH(2)       | 0.20             | 0.16                 | -1.02     | -0.66     |
| 2- $V_{Cu-Cl-Cu_2O(111)}$  | *OH(2)        | 0.32             | 0.00                 | -2.44     | -2.11     |
| 2- $V_{Cu-Cl-Cu_2O(111)}$  | *O(2)         | 0.47             | 0.00                 | -3.14     | -2.67     |
| 2- $V_{Cu-Cl-Cu_2O(111)}$  | *OOH(2)       | 0.21             | 0.15                 | -1.02     | -0.65     |

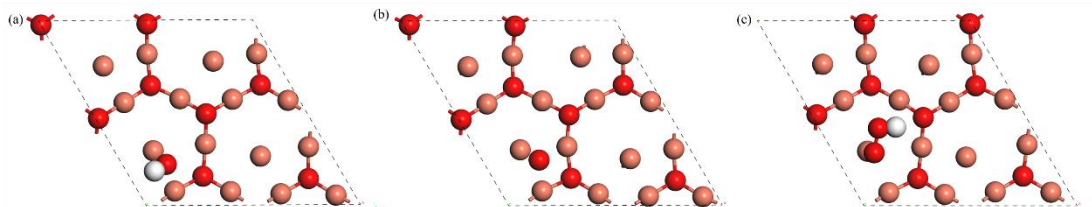

**Fig. S1** The optimized adsorbed intermediates of (a) \*OH, (b) \*O, and (c) \*OOH on active site 1 of  $Cu_2O(111)$ .

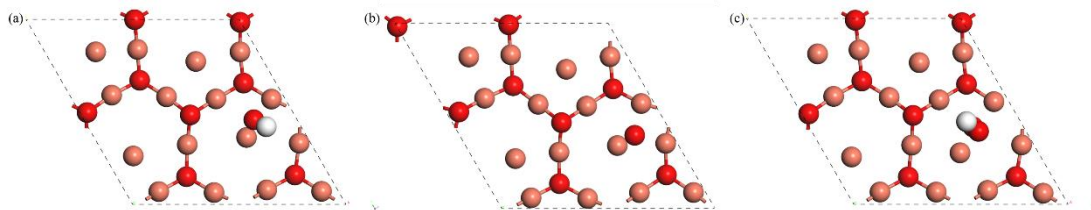

**Fig. S2** The optimized adsorbed intermediates of (a) \*OH, (b) \*O, and (c) \*OOH on active site 2 of Cu<sub>2</sub>O(111).

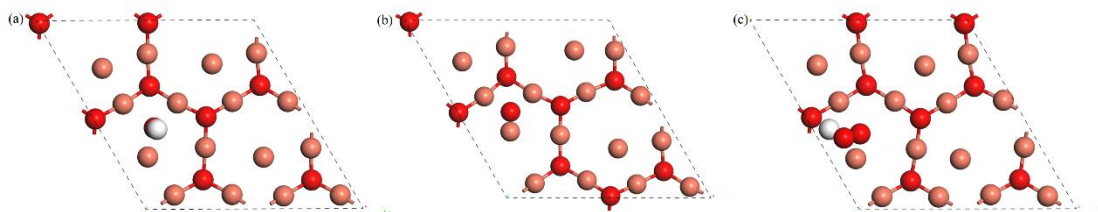

**Fig. S3** The optimized adsorbed intermediates of (a) \*OH, (b) \*O, and (c) \*OOH on active site 3 of Cu<sub>2</sub>O(111).

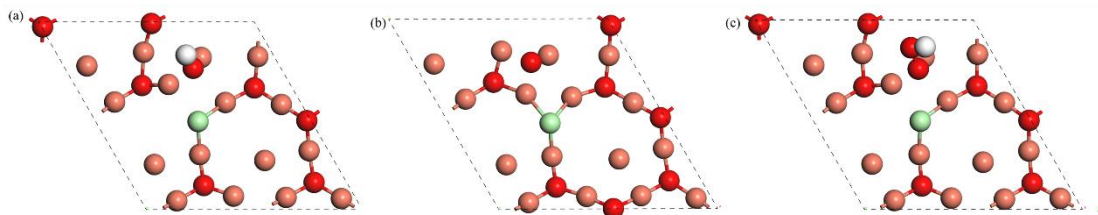

**Fig. S4** The optimized adsorbed intermediates of (a) \*OH, (b) \*O, and (c) \*OOH on active site 1 of Cl-Cu<sub>2</sub>O(111).

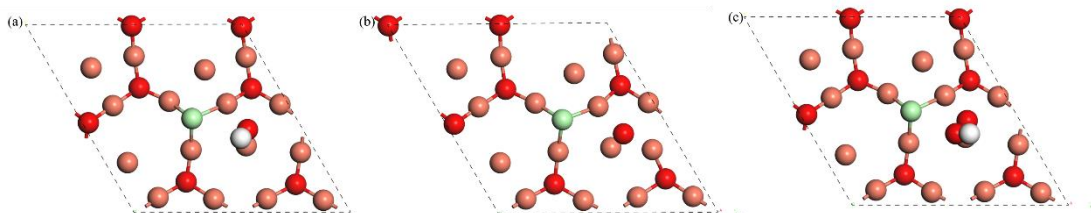

**Fig. S5** The optimized adsorbed intermediates of (a) \*OH, (b) \*O, and (c) \*OOH on active site 2 of Cl-Cu<sub>2</sub>O(111).

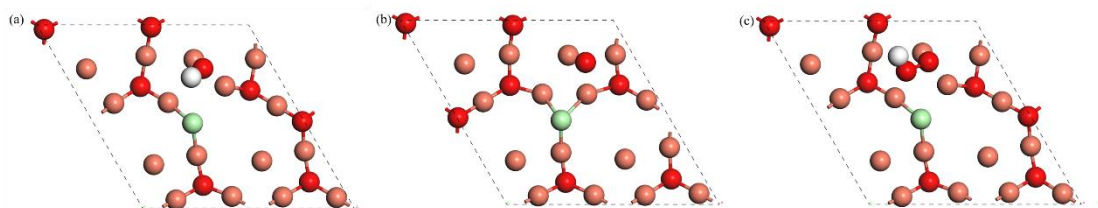

**Fig. S6** The optimized adsorbed intermediates of (a) \*OH, (b) \*O, and (c) \*OOH on active site 3 of Cl-Cu<sub>2</sub>O(111).

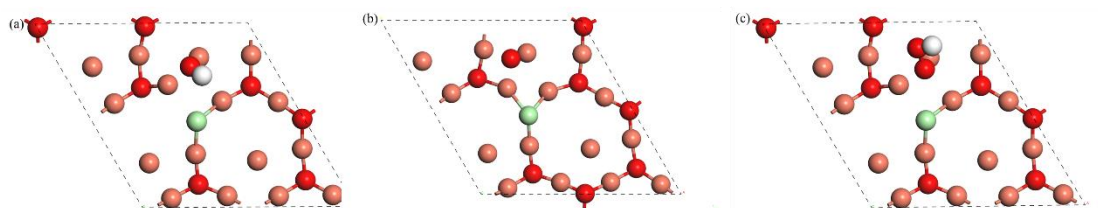

**Fig. S7** The optimized adsorbed intermediates of (a) \*OH, (b) \*O, and (c) \*OOH on active site 4 of Cl-Cu<sub>2</sub>O(111).

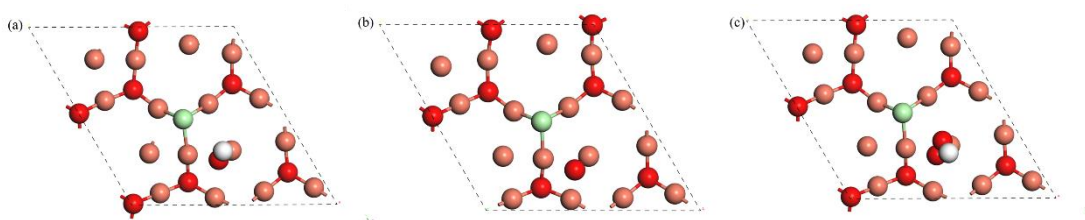

**Fig. S8** The optimized adsorbed intermediates of (a) \*OH, (b) \*O, and (c) \*OOH on active site 5 of Cl-Cu<sub>2</sub>O(111).



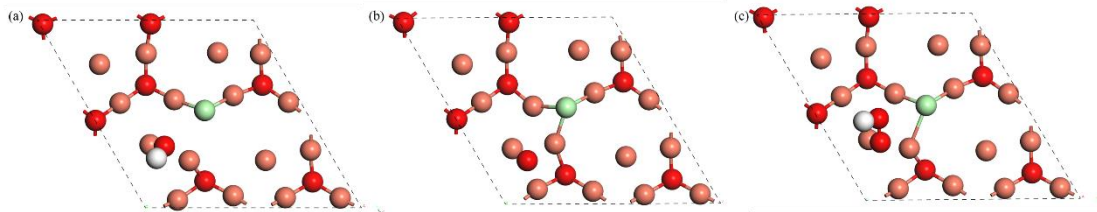

**Fig. S9** The optimized adsorbed intermediates of (a) \*OH, (b) \*O, and (c) \*OOH on active site 6 of Cl-Cu<sub>2</sub>O(111).

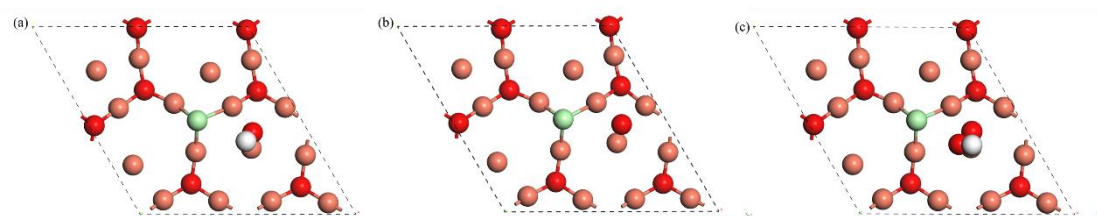

**Fig. S10** The optimized adsorbed intermediates of (a) \*OH, (b) \*O, and (c) \*OOH on active site 7 of Cl-Cu<sub>2</sub>O(111).

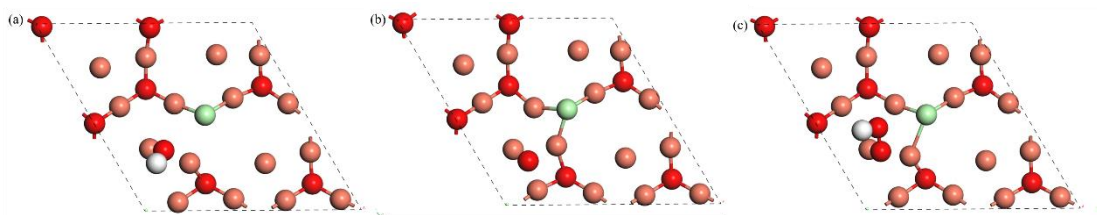

**Fig. S11** The optimized adsorbed intermediates of (a) \*OH, (b) \*O, and (c) \*OOH on active site 8 of Cl-Cu<sub>2</sub>O(111).

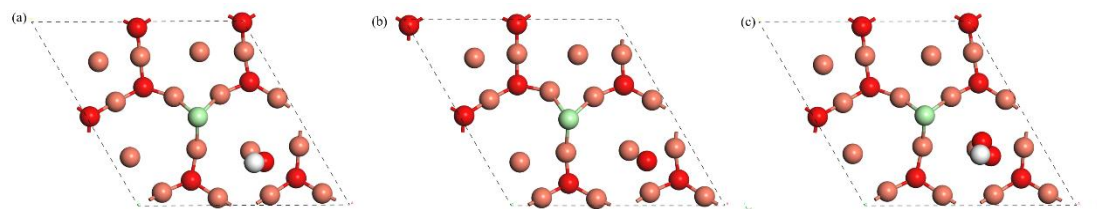

**Fig. S12** The optimized adsorbed intermediates of (a) \*OH, (b) \*O, and (c) \*OOH on active site 9 of Cl-Cu<sub>2</sub>O(111).

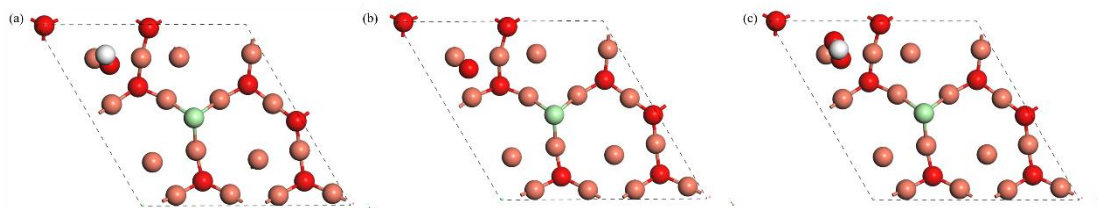

**Fig. S13** The optimized adsorbed intermediates of (a) \*OH, (b) \*O, and (c) \*OOH on active site 10 of Cl-Cu<sub>2</sub>O(111).

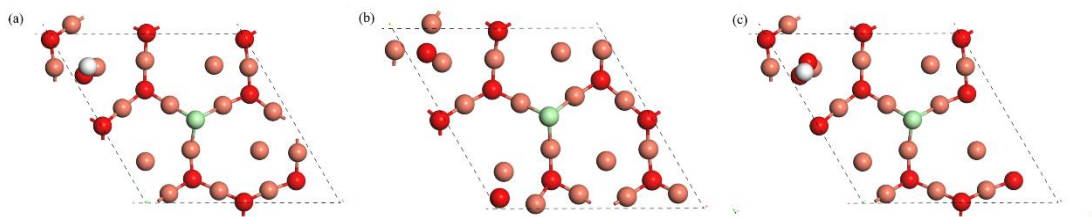

**Fig. S14** The optimized adsorbed intermediates of (a) \*OH, (b) \*O, and (c) \*OOH on active site 11 of Cl-Cu<sub>2</sub>O(111).

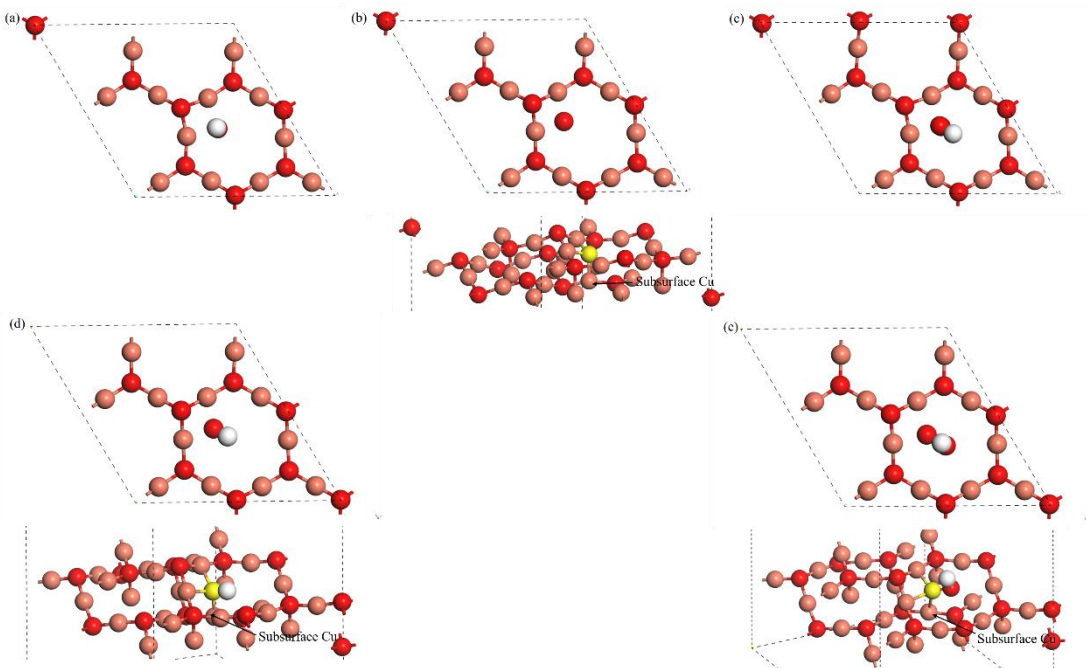

**Fig. S15** The optimized adsorbed intermediates of (a)  $*OH(2)$ , (b)  $*O(3)$ , (c)  $*OOH(2)$ , (d)  $*OH(3)$ , and (e)  $*OOH(3)$  on active site 1 of  $V_{Cu}-Cu_2O(111)$ . The coordinated O\* atoms are in yellow in side views.

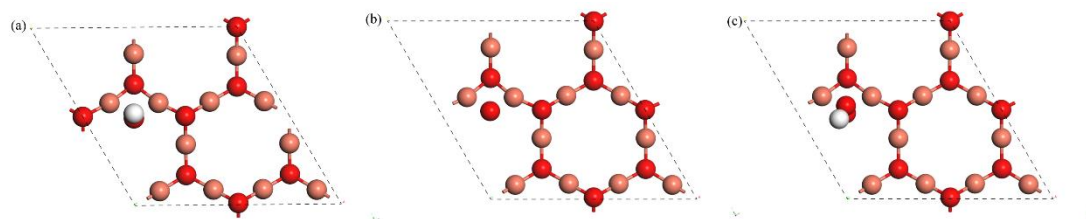

**Fig. S16** The optimized adsorbed intermediates of (a)  $*OH$ , (b)  $*O$ , and (c)  $*OOH$  on active site 2 of  $V_{Cu}-Cu_2O(111)$ .

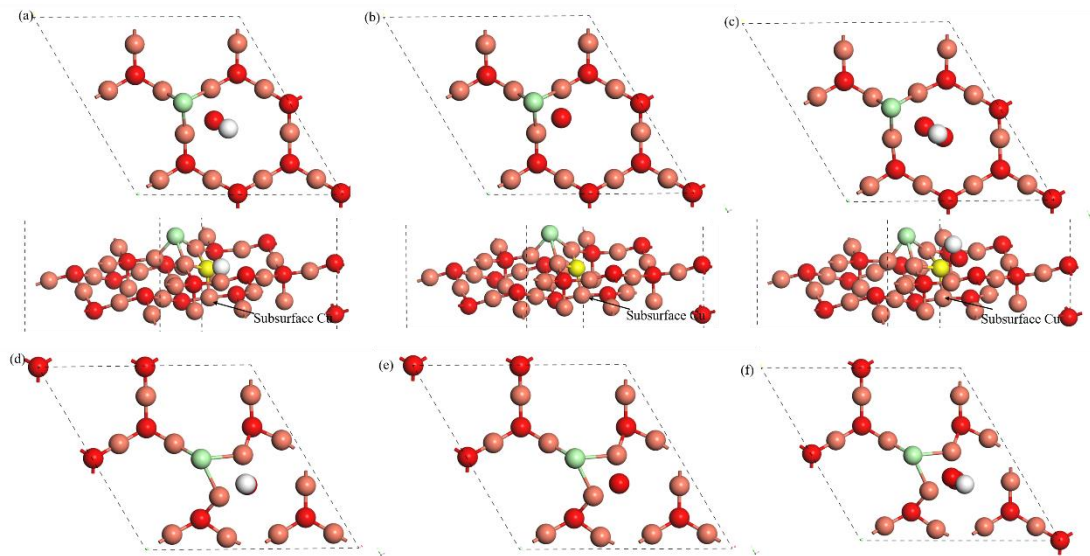

**Fig. S17** The optimized adsorbed intermediates of (a)  $*OH(3)$ , (b)  $*O(3)$ , (c)  $*OOH(3)$ , (d)  $*OH(2)$ , (e)  $*O(2)$  and (f)  $*OOH(2)$  on active site 1 of  $V_{Cu-Cl-Cu_2O}(111)$ . The coordinated O\* atoms are in yellow in side views.

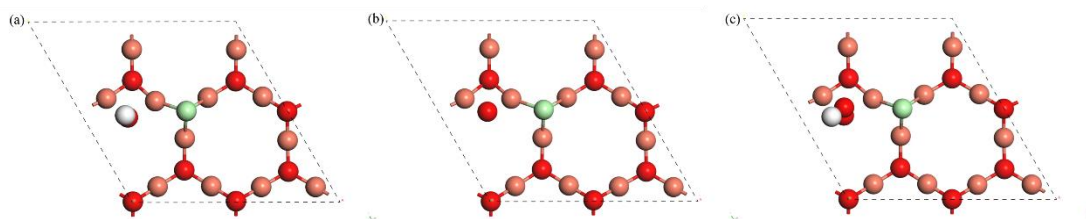

**Fig. S18** The optimized adsorbed intermediates of (a)  $*OH$ , (b)  $*O$ , and (c)  $*OOH$  on active site 2 of  $V_{Cu-Cl-Cu_2O}(111)$ .

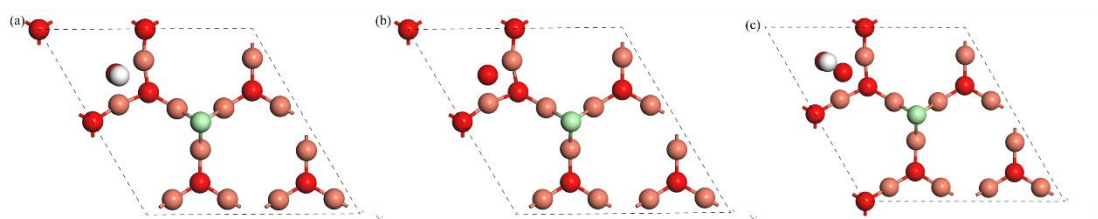

**Fig. S19** The optimized adsorbed intermediates of (a)  $*OH$ , (b)  $*O$ , and (c)  $*OOH$  on active site 3 of  $V_{Cu-Cl-Cu_2O}(111)$ .

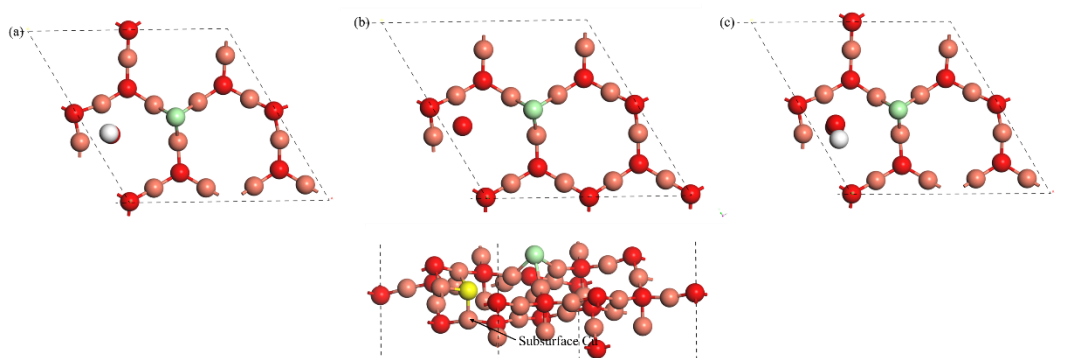

**Fig. S20** The optimized adsorbed intermediates of (a) \*OH(2), (b) \*O(3), and (c) \*OOH(2) on active site 4 of  $V_{Cu}\text{-Cl-Cu}_2\text{O}(111)$ . The coordinated  $O^*$  atoms are in yellow in side views.

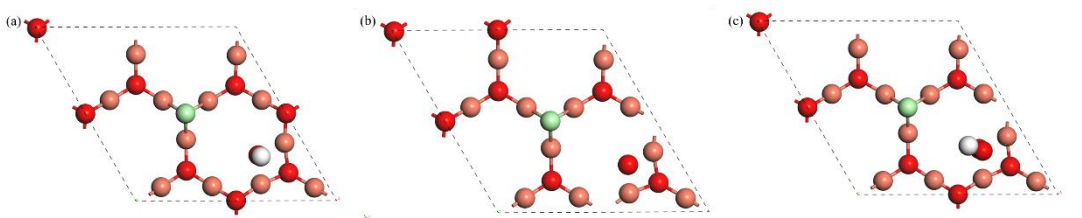

**Fig. S21** The optimized adsorbed intermediates of (a) \*OH, (b) \*O, and (c) \*OOH on active site 5 of  $V_{Cu}\text{-Cl-Cu}_2\text{O}(111)$ .

**Table S7** Bader charge of OH absorbing at the most active site on  $\text{Cu}_2\text{O}(111)$ ,  $\text{Cl-Cu}_2\text{O}(111)$ ,  $V_{Cu}\text{-Cu}_2\text{O}(111)$  and  $V_{Cu}\text{-Cl-Cu}_2\text{O}(111)$ .

| surface                                 | *OH charge ( $ e $ ) |
|-----------------------------------------|----------------------|
| 3- $\text{Cu}_2\text{O}(111)$           | -0.559               |
| 7- $\text{Cl-Cu}_2\text{O}(111)$        | -0.561               |
| 2- $V_{Cu}\text{-Cu}_2\text{O}(111)$    | -0.475               |
| 2- $V_{Cu}\text{-Cl-Cu}_2\text{O}(111)$ | -0.505               |

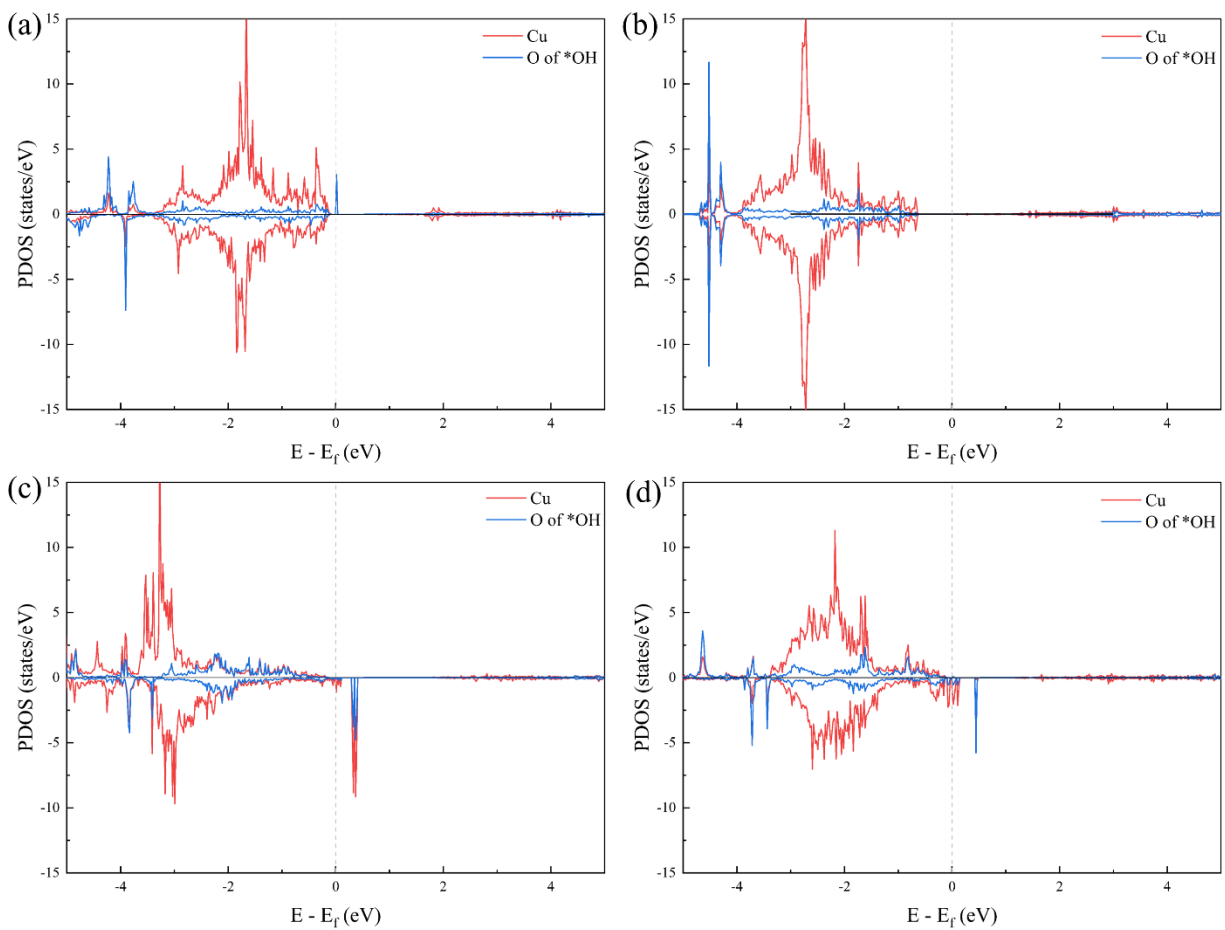

**Fig. S22** The projected density of states (PDOS) of OH\* absorbing at the most active site on (a) Cu<sub>2</sub>O(111), (b) Cl-Cu<sub>2</sub>O(111), (c) V<sub>Cu</sub>-Cu<sub>2</sub>O(111) and (d) V<sub>Cu</sub>-Cl-Cu<sub>2</sub>O(111), where the Fermi energy was set to zero (dashed line).

**Table S8** Comparison of Gibbs reaction free energy changes ( $\Delta G$ ) of each elementary step and overpotential ( $\eta$ ) on the active sites of different  $\text{Cu}_2\text{O}(111)$  surfaces with or without an implicit model.

| surface                                                   | implicit solvation model | $\Delta G^*_{\text{OH}}$ (eV) | $\Delta G^*_{\text{O}}$ (eV) | $\Delta G^*_{\text{OOH}}$ (eV) | $\eta$ (V) |
|-----------------------------------------------------------|--------------------------|-------------------------------|------------------------------|--------------------------------|------------|
| 3- $\text{Cu}_2\text{O}(111)$                             | without                  | 0.86                          | 1.92                         | 4.05                           | 0.90       |
|                                                           | with                     | 0.64                          | 1.70                         | 3.48                           | 0.54       |
| 7-Cl- $\text{Cu}_2\text{O}(111)$                          | without                  | -0.12                         | 1.68                         | 3.32                           | 0.58       |
|                                                           | with                     | -0.39                         | 1.40                         | 2.93                           | 0.76       |
| 2- $\text{V}_{\text{Cu}}$ - $\text{Cu}_2\text{O}(111)$    | without                  | 1.50                          | 3.25                         | 4.80                           | 0.52       |
|                                                           | with                     | 1.27                          | 2.97                         | 4.42                           | 0.47       |
| 2- $\text{V}_{\text{Cu}}$ -Cl- $\text{Cu}_2\text{O}(111)$ | without                  | 1.57                          | 3.26                         | 4.82                           | 0.46       |
|                                                           | with                     | 1.43                          | 3.03                         | 4.53                           | 0.36       |

## Reference

- 1 J. K. Nørskov, J. Rossmeisl, A. Logadottir, L. Lindqvist, J. R. Kitchin, T. Bligaard and H. Jónsson, *The Journal of Physical Chemistry B*, 2004, **108**, 17886-17892.
